# Supplementary material
Source: ML conference proceedings conference paper supplement (https://openreview.net/forum?id=krF62hkrfR)
Supplement: supplementary_material [file nbf-appendix.pdf › supplementary-material/nbf-appendix.pdf]

## 428 A NBF Pseudocode

429 We present the full pseudocode for Neural Bayesian Filtering. The algorithm updates the input  
 430 belief embedding by generating and then simulating  $n$  particles for a single step. These particles are  
 431 weighed according to the probability of input observation  $y$  given the environment dynamics  $G$  and  
 432 control variable  $\pi$ .

---

### Algorithm 1: Neural Bayesian Filtering

---

**input** :  $\theta$  — Belief Embedding,  $y$  — Observation,  $G$  — Environment,  $\pi$  — Control,  
 ( $\psi, \phi$ ) — Model Parameters,  $n$  — Number of Particles,  $\varphi$  — function to estimate  $\mathbb{E}_p[\varphi]$   
**output** :  $\theta'$  — Updated Belief Embedding

```

1  $z_{1:n} \stackrel{\text{iid}}{\sim} \mathcal{N}(0_d, I_d)$  //  $n$  samples of  $d$ -dimensional Gaussian noise
2  $x_{1:n} \leftarrow f_\psi(z_{1:n}; \theta)$  // Generate particles from belief embedding
3 for  $i \leftarrow 1 \dots n$  do
4    $x'_i \sim T_G(x_i, \pi)$ 
5    $w_i \leftarrow T_G(x_i, \pi)[x'_i] \cdot H_G(x_i, x'_i)[y]$ 
6 end
7  $\hat{\mu}^{(n)}(\varphi) \leftarrow \frac{\sum_{i=1}^n w_i \varphi(x_i)}{\sum_{i=1}^n w_i}$  // Estimate target expectation
8 return  $\mathcal{E}_\phi(x'_{1:n}, \text{normalize}(w_{1:n})), \hat{\mu}^{(n)}(\varphi)$  // Output embedding and estimate  $\mathbb{E}_p[\varphi]$ 

```

---

433 The algorithm can optionally estimate the expectation (Line 7) of a target function  $\varphi$  over the belief  
 434 state. Next, we show theoretical results about the convergence of the estimate when NBF has access  
 435 to a perfect belief embedding model.

## 436 B Proof of Theorem 4.1

437 The theorem requires two main assumptions: a perfect belief embedding model and  $\epsilon$ -global observa-  
 438 tion positivity. A *perfect* embedding model has of two properties. First, for every  $p(x) \in \mathcal{P}_G^\Pi$ , there  
 439 exists a  $\theta_p^* \in \mathbb{R}^m$  such that  $p_{\theta_p^*}(x) = p(x)$ . Second, for any finite collection of samples  $x_{1:n} \in X^n$   
 440 and weights  $w_{1:n} \in \mathbb{R}^n$ ,  $\sum_{i=1}^n w_i = 1$ , if the weighted empirical distribution induced by  $(x_{1:n}, w_{1:n})$ ,  
 441  $\hat{p}(x)$  is equal to  $p(x)$ , then  $\mathcal{E}_\phi(x_{1:n}, w_{1:n}) = \theta_p^*$ .

442 Define the successor pairs of state space  $X$  given  $(G, \pi)$  as  $\text{succ}_{G, \pi}(X) \stackrel{\text{def}}{=} \{(x, x') : x, x' \in$   
 443  $X, T_G(x, \pi)[x'] > 0\}$ .  $\epsilon$ -global observation positivity of  $(G, \pi)$  states that there exists an  $\epsilon \in (0, 1]$   
 444 such that for all  $y \in Y$  and  $(x, x') \in \text{succ}_{G, \pi}(X)$ :

$$T(x, \pi)[x'] \cdot H_G(x, x')[y] \geq \epsilon$$

445 This means that for  $G$  and  $\pi$ , every transition has some probability of generating any observation  $y$ . In  
 446 practice, a small  $\epsilon$  is sufficient to guarantee NBF's consistency. Without this simplifying assumption,  
 447 there can be a non-zero (but vanishing) chance that the sample weights in the estimator  $\hat{\mu}^{(n)}(\varphi)$  are  
 448 all equal to zero. In a practical setting where this happens, one could repeat lines 2-6 of Algorithm 1  
 449 until some  $w_i > 0$ . With finite state and observation spaces and these assumptions, we can prove the  
 450 almost-sure convergence of NBF to the target posterior. First, we provide a lemma for the strong law  
 451 of large numbers for self-normalizing importance samplers. The proof is an adaptation of the one  
 452 found in Owen [2013].

453 **Lemma B.1** (Strong Law for Self-Normalized Importance Sampling Estimators). *Given a finite*  
 454 *sample space  $X$ , let  $p(x)$  be a target distribution and  $q(x)$  be a proposal distribution such that  $q(x) >$*   
 455 *0 whenever  $p(x) > 0$ . Let  $W : X \rightarrow (0, 1]$  be a weight function such that  $p(x) = c \cdot W(x)q(x)$  for*  
 456 *normalization constant  $c$ . Finally, let  $\varphi : X \rightarrow \mathbb{R}$  be any bounded function.*

457 *Draw samples  $x_1, \dots, x_n \stackrel{\text{iid}}{\sim} q$ . Let  $w_i = W(x_i)$  and*

$$\hat{\mu}^{(n)}(\varphi) = \frac{\sum_{i=1}^n w_i \varphi(x_i)}{\sum_{i=1}^n w_i}$$

458 be the self-normalized importance sampling estimate of  $\mathbb{E}_p[\varphi]$ . Then,

$$\hat{\mu}^{(n)}(\varphi) \xrightarrow{\text{a.s.}} \mathbb{E}_p[\varphi]$$

459 as  $n \rightarrow \infty$ .

460 *Proof.* Since the pairs  $(w_i, x_i)$  are i.i.d., the numerator  $S_n \stackrel{\text{def}}{=} \sum_{i=1}^n w_i \varphi(x_i)$  and denominator  
 461  $B_n \stackrel{\text{def}}{=} \sum_{i=1}^n w_i$  of the estimate are i.i.d. sums. With bounded  $\varphi$  and  $W$ , we can apply Kolmogorov's  
 462 Strong Law of Large Numbers to  $S_n$  and  $B_n$ , which gives

$$\frac{S_n}{n} \xrightarrow{\text{a.s.}} \mathbb{E}_q[\varphi W], \quad \frac{B_n}{n} \xrightarrow{\text{a.s.}} \mathbb{E}_q[W]$$

463 as  $n \rightarrow \infty$ .

464 By the definition of  $q$  and  $W$ ,  $1 = \sum_x p(x) = \sum_x cW(x)q(x) = c\mathbb{E}_q[W]$ . Thus,  $\mathbb{E}_q[W] = c^{-1}$ .  
 465 Since  $\mathbb{E}_q[\varphi W] = c^{-1}\mathbb{E}_q[\varphi Wc] = c^{-1}\mathbb{E}_p[\varphi]$ .

466 Thus, by the Continuous Mapping Theorem [Mann and Wald, 1943], we have

$$\hat{\mu}^{(n)}(\varphi) = \frac{S_n/n}{B_n/n} \xrightarrow{\text{a.s.}} \frac{c^{-1}\mathbb{E}_p[\varphi]}{c^{-1}} = \mathbb{E}_p[\varphi]$$

467 as  $n \rightarrow \infty$ . □

468 Applying this Lemma to the one-step particle update of NBF lets us show that if the current estimate  
 469  $\theta$  is consistent, then  $\theta$  is also consistent in the limit.

470 **Theorem B.2** (NBF Consistency). Assume  $\epsilon$ -global observation positivity of  $(G, \pi)$  and a finite  $X$   
 471 and  $Y$ . For any finite horizon  $t_{\max}$ , belief state  $p_t(x)$ ,  $t \leq t_{\max}$ , and any bounded function  $\varphi : X \rightarrow \mathbb{R}$ ,  
 472 let

$$\hat{\mu}_t^{(n)}(\varphi) = \frac{\sum_{i=1}^n w_i \varphi(x_i)}{\sum_{i=1}^n w_i}$$

473 be the estimate of  $\mathbb{E}_{p_t}[\varphi]$  computed by NBF with a perfect embedding model and  $n$  particles. Then,

$$\sup_{0 \leq t \leq t_{\max}} |\hat{\mu}_t^{(n)}(\varphi) - \mathbb{E}_{p_t}[\varphi]| \xrightarrow{\text{a.s.}} 0$$

474 as  $n \rightarrow \infty$ .

475 *Proof.* According to Algorithm 1, the weight for transitioning from  $x_i$  to  $x'_i$  is  $w_i = T_G(x_i, \pi)[x'_i] \cdot$   
 476  $H_G(x_i, x'_i)[y]$ . We start by proving almost sure convergence for any fixed  $t \leq t_{\max} : t, t_{\max} \in \mathbb{N}$  by  
 477 induction.

478 **Base case.**  $t = 0$  Here  $p(x) = p_0$ , so a perfect embedding model implies we can compute  $\theta_p^*$  by  
 479 embedding samples from  $p_0$  and then generate  $x_{1:n} \stackrel{\text{iid}}{\sim} p(x)$ .  $\varphi$  is bounded, so we can apply the  
 480 Strong Law of Large Numbers to get the result.

481 **Inductive step.** Assume for some  $t < t_{\max}$ , generated particles  $x_{1:n}$  are i.i.d. according to  $p_t(x)$ .  
 482 After the loop in Algorithm 1, we have  $x'_{1:n}$  distributed according to the proposal  $q(x) =$   
 483  $\sum_{x'} p_t(x') T_G(x', \pi)[x]$  with weight function  $W = H_G(x', x)[y]$ . Note that the exact posterior  
 484 at time  $t + 1$  can be written as

$$p_{t+1}(x) = \frac{\sum_{x'} p_t(x') T_G(x', \pi)[x] \cdot H_G(x', x)[y]}{c} = q(x)W(x)/c \quad (1)$$

485 for some normalization constant  $c$ .

486  $\epsilon$ -global observation positivity implies that for all  $x \in X$  both  $p_{t+1}(x) > 0 \implies q(x) > 0$  and  
 487  $W(x) > 0$  (see Algorithm 1 Line 5). Since  $T_G$  and  $H_G$  output probability mass functions,  $W(x) \leq 1$   
 488 for all  $x \in X$ . As a result, we can apply Lemma B.1 and get that  $\hat{\mu}_{t+1}^{(n)}(\varphi) \xrightarrow{\text{a.s.}} \mathbb{E}_{p_{t+1}}[f]$  as  $n \rightarrow \infty$ .

489 This implies that embedding  $\theta_{p_{t+1}}^* = \mathcal{E}_\phi(x'_{1:n}, w_{1:n})$  and regenerating  $x''_{1:n} \stackrel{\text{iid}}{\sim} p_{\theta_{t+1}^*}(x) = p_{t+1}(x)$   
 490 using a perfect model gives the desired result.

491 **Almost sure convergence of the sequence.** Now that we have shown almost sure convergence for  
 492 any  $t \leq t_{\max}$ , we can complete the proof of the theorem. For any  $\delta > 0$ , there exists a random integer  
 493  $N_t = \min\{n : \forall m \geq n, |\hat{\mu}_t^{(n)}(\varphi) - \mathbb{E}_{p_t}[\varphi]| \leq \delta\}$ . Let  $N = \sup_{0 \leq t \leq t_{\max}} \{N_t : t \leq t_{\max}\}$ , then for  
 494 all  $n \geq N$  we have  $|\hat{\mu}_t^{(n)}(\varphi) - \mathbb{E}_{p_t}[\varphi]| \leq \delta$  for every  $t \leq t_{\max}$ .

495 □

496 **Corollary B.3.** Under the same conditions as Theorem 4.1 as  $n \rightarrow \infty$ ,

$$\sup_{0 \leq t \leq t_{\max}} |\hat{\mu}_t^{(n)}(\varphi) - \mathbb{E}_{p_t}[\varphi]| = O_p(n^{-1/2})$$

497 *Proof.* From Equation 1, let  $\tilde{p}_t(x) \stackrel{\text{def}}{=} c p_t(x) = W(x)q(x)$  and denote  $w_i \stackrel{\text{def}}{=} W(x_i) = \frac{\tilde{p}_t(x_i)}{q(x_i)}$  for  
 498  $1 \leq i \leq n$ . Let  $Z_i \stackrel{\text{def}}{=} w_i(\varphi(x) - \mathbb{E}_p[\varphi])$ . Then,

$$\begin{aligned} \mathbb{E}_q[Z_i] &= \sum_x q(x) w_i(\varphi(x) - \mathbb{E}_p[\varphi]) \\ &= \sum_x \tilde{p}_t(\varphi(x) - \mathbb{E}_p[\varphi]) \\ &= c \mathbb{E}_p[\varphi] - c \mathbb{E}_p[\varphi] = 0 \end{aligned}$$

499 So  $Z_i$  have mean zero and are independent.

500 Now take the denominator of the estimate  $B_n = \sum_{i=1}^n w_i$ . By  $\epsilon$ -global observation positivity,  $w_i \geq \epsilon$ ,  
 501 so  $B_n \geq n\epsilon \implies B_n^{-2} \leq (\epsilon^2 n^2)^{-1}$ .

502 Since,

$$\hat{\mu}_t^{(n)}(\varphi) - \mathbb{E}_{p_t}[\varphi] = \frac{\sum_{i=1}^n Z_i}{B_n},$$

503 it follows that, by independence and zero mean of  $Z_i$ ,

$$\mathbb{E}[(\hat{\mu}_t^{(n)}(\varphi) - \mathbb{E}_{p_t}[\varphi])^2] = \mathbb{E}[B_n^{-2} (\sum_{i=1}^n Z_i)^2] \leq \frac{1}{\epsilon^2 n^2} \sum_{i=1}^n \text{Var}[Z_i].$$

504  $\varphi$  is bounded, so  $\text{Var}[Z_i] \leq \text{Var}_{p_t}[\varphi] \leq \|\varphi\|_\infty^2 < \infty$ . Define  $\sigma_t^2 \stackrel{\text{def}}{=} \text{Var}_{p_t}[\varphi]$ , so  $\sum_{i=1}^n \text{Var}[Z_i] \leq$   
 505  $n\sigma^2$ . Plugging this into the previous bound and taking the supremum over  $t$  gives

$$\sup_{0 \leq t \leq t_{\max}} \mathbb{E}[(\hat{\mu}_t^{(n)}(\varphi) - \mathbb{E}_{p_t}[\varphi])^2] \leq \sup_{0 \leq t \leq t_{\max}} \frac{\sigma_t^2}{\epsilon^2 n} = \frac{\sigma^2}{\epsilon^2 n}$$

506 for  $\sigma^2 \stackrel{\text{def}}{=} \sup_{0 \leq t \leq t_{\max}} \sigma_t^2$ .

507 Applying Chebyshev's inequality gives, for any  $\delta > 0$

$$\Pr[|\hat{\mu}_t^{(n)}(\varphi) - \mathbb{E}_{p_t}[\varphi]| \geq \delta] \leq \frac{\sigma_t^2}{\epsilon^2 n \delta^2}$$

508 Therefore,

$$\Pr[\sup_{0 \leq t \leq t_{\max}} |\hat{\mu}_t^{(n)}(\varphi) - \mathbb{E}_{p_t}[\varphi]| \geq \delta] \leq \frac{(t_{\max} + 1)\sigma^2}{\epsilon^2 n \delta^2}$$

509 Setting  $\delta = M/\sqrt{n}$  for  $M > 0$  gives:

$$\Pr[\sqrt{n} \sup_{0 \leq t \leq t_{\max}} |\hat{\mu}_t^{(n)}(\varphi) - \mathbb{E}_{p_t}[\varphi]| \geq M] \leq \frac{(t_{\max} + 1)\sigma^2}{\epsilon^2 M^2}$$

510 which lets us apply the definition of stochastic boundedness [Van der Vaart 2000] to finish the  
 511 proof. □

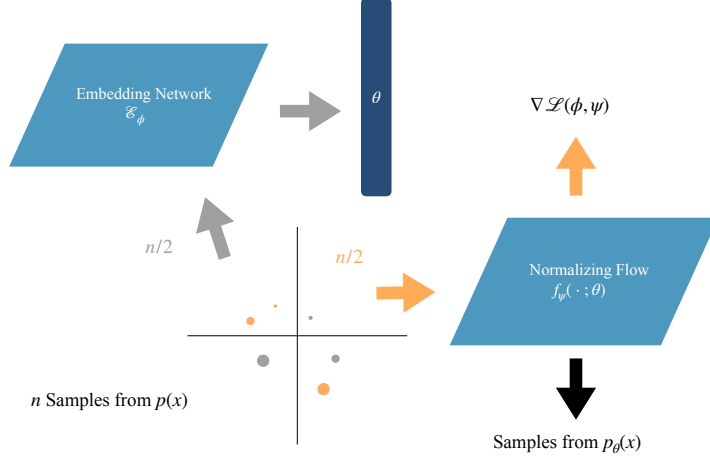

Figure 7: Training belief embedding models. Colored arrows show the flow of training sample points from the target distribution.

## C Additional Experimental Details

Figure C outlines the training process for the belief models used to embed distributions in all of our experiments. Belief embedding models are trained by generating  $n$  samples from a belief state instance  $p(x)$  from the set of target distributions ( $\mathcal{P}_G^\Pi$  in Goofspiel and Gridworld). Half of the samples are used to compute the embedding  $\theta$  that conditions the generative model  $f_\psi(z; \theta)$ . The rest of the samples are used to approximate the gradient of  $\mathcal{L}(\phi, \psi)$ .

All experiments were implemented in Jax using standard libraries from the Jax ecosystem. We used custom implementations for Normalizing Flows and both environments. All source code is available as part of the supplementary material. Next, we provide domain-specific details about the models used in our experiments.

### C.1 Gridworld

Parameters for the set of grids used for training and evaluation are shown in Table 2

**Belief Embedding Model.** The embedding function  $\mathcal{E}_\phi$  consisted of a standard MLP with 3 layers of 128 units each and ReLU activations. The generative model  $f_\psi(z; \theta)$  used a uniform prior and 5 coupling layers (Dinh et al., 2016) with masked inputs. Variational dequantization (Ho et al., 2019) was performed to smooth discrete grid locations. More hyperparameters are shown in Table 1

**Recurrent Model.** The recurrent baseline learns a mapping from a sequence of observations about movement in the grid to an approximation of  $p(x)$ . These observations are the same as those used to define the posteriors in the filtering tasks. Since belief states in Gridworlds of these sizes are small, the model outputs a softmax distribution over potential grid locations. JS divergence between model output and belief state instances was minimized directly. More hyperparameters are shown in Table 1

**Computational Resources.** For each random seed, model training required roughly 2 CPU-hours on commodity consumer hardware. Each evaluation (consisting of 500 episodes) took at most 3 CPU-hours. Since every experiment was repeated for 100 seeds, the end-to-end compute requirements were roughly 500 CPU-hours for each of the 8 grid configurations. We used cluster resources provided by a source that will be revealed upon publication.

### C.2 Goofspiel

**Goofspiel Policy Generation.** We generated a sequence of policies by independent self-play using PPO to simulate the effect of changing policies during learning, as in classical self-play settings. We

Table 1: Gridworld model and training hyperparameters.

|                                      | Belief Embedding Model | Recurrent Baseline |
|--------------------------------------|------------------------|--------------------|
| Embedding size                       | 32                     | —                  |
| Embedding network hidden units       | 128                    | —                  |
| Embedding network hidden layers      | 3                      | —                  |
| Dequantization hidden units          | 32                     | —                  |
| Dequantization hidden layers         | 2                      | —                  |
| Normalizing Flow / RNN hidden units  | 32                     | 32                 |
| Normalizing Flow / RNN hidden layers | 5                      | 2                  |
| Normalizing Flow coupling layers     | 5                      | —                  |
| Batch size                           | 32                     | 32                 |
| Training steps                       | 100 000                | 100 000            |
| Training samples (per $p(x)$ )       | 64                     | —                  |
| Optimizer                            | AdaGrad                | AdaGrad            |
| Learning rate                        | 0.10                   | 0.10               |

Table 2: GridWorld environment parameters.

| Parameter                           | $5 \times 5$       | $8 \times 8$       |
|-------------------------------------|--------------------|--------------------|
| Obstacle cubes                      | 1                  | 2                  |
| Cube width                          | 2                  | 3                  |
| Softmax temp. (for random policies) | $1 \times 10^{-5}$ | $1 \times 10^{-5}$ |

used the Jax version of StableBaselines 3 (SBX) [Raffin *et al.*, 2021]—modified to support action masking. In self-play, we trained a policy against its previous checkpoint for 524 288 timesteps and saved a checkpoint every 4096 timesteps. We repeated this self-play loop four times, producing a sequence of 512 policies in total.

**Belief Embedding Model.** The belief embedding model for Goofspiel uses a Standard Normal prior, and consists of a variational dequantization layer parameterized by a single coupling layer, followed by a series of coupling layers. The dequantization coupling layer uses an affine transformation, and each of the following layers use one-dimensional non-linear squared (NLSq) transformations. All coupling layers transform masked inputs. After dequantization, each coupling layer is further parameterized by  $\theta$ . Concrete hyperparameters used in our experiments are listed in Table 3.

**Recurrent Model.** Observations in Goofspiel consist of features such as the player’s hand, the prize deck, the current one-hot encoded prize card, and the winnings. The recurrent baseline learns a mapping from a sequence of these observations to an embedding. This embedding conditions a Normalizing Flow with the same architecture as described above. The key difference is that the recurrent model maps the observation sequence to an embedding directly, whereas the belief embedding model embeds sample sets from  $p(x)$ .

**Computational Resources.** Goofspiel experiments were run on computing resources provided by a source that will be revealed upon publication. For each game size and each random seed, belief model training required approximately 12 hours and recurrent model training approximately 3 hours on 32 CPU cores. Afterwards, each model was evaluated for 500 episodes, which took between several minutes and three hours on 12 CPU cores, depending on the size of the game. The evaluation was repeated 10 times.

### C.3 Donuts

For our illustrative example from Section 3 we used a scaled-down version of the belief embedding model used in the main experiments. Model and training hyperparameters are shown in Table 4. Donuts models train in several minutes on a laptop.

Table 3: Goofspiel model and training hyperparameters.

|                                      | Belief Embedding Model | Recurrent Baseline |
|--------------------------------------|------------------------|--------------------|
| Embedding size                       | 48                     | 48                 |
| Embedding network LSTM hidden units  | –                      | 64                 |
| Embedding network LSTM hidden layers | –                      | 2                  |
| Embedding network MLP hidden units   | 128                    | 64                 |
| Embedding network MLP hidden layers  | 3                      | 2                  |
| Dequantization hidden units          | 48                     | 48                 |
| Dequantization hidden layers         | 2                      | 2                  |
| Normalizing Flow MLP hidden units    | 128                    | 64                 |
| Normalizing Flow MLP hidden layers   | 4                      | 4                  |
| Normalizing Flow coupling layers     | 8                      | 8                  |
| Batch size                           | 64                     | 64                 |
| Training steps                       | 150 000                | 16 000             |
| Training samples (per $p(x)$ )       | 64                     | 32                 |
| Optimizer                            | Nadam                  | Nadam              |
| Learning rate                        | 0.001                  | 0.001              |

Table 4: Donuts model and training hyperparameters.

|                                    | Normalizing Flow Model | Cond. FM Model |
|------------------------------------|------------------------|----------------|
| Embedding size                     | 8                      | 8              |
| Embedding network hidden units     | 64                     | 64             |
| Embedding network hidden layers    | 3                      | 3              |
| Dequantization hidden units        | –                      | –              |
| Dequantization hidden layers       | –                      | –              |
| Normalizing Flow MLP hidden units  | 32                     | 64             |
| Normalizing Flow MLP hidden layers | 3                      | 4              |
| Normalizing Flow coupling layers   | 8                      | –              |
| Batch size                         | 32                     | 32             |
| Training steps                     | 30 000                 | 30 000         |
| Training samples (per $p(x)$ )     | 128                    | 128            |
| Optimizer                          | Adam                   | Adam           |
| Learning rate                      | 0.001                  | 0.001          |

## D Illustrative Example using Conditional Flow Matching

To highlight the versatility of our proposed approach, we applied a Conditional Flow Matching (CFM) model [Lipman *et al.*, 2022, Tong *et al.*, 2023] to the donut-shaped distributions introduced as a toy domain described in Section 3. We experimented with both independent coupling and optimal transport (OT) coupling [Lipman *et al.*, 2022] to define the target vector fields that generate the conditional probability paths in our flow matching models. An example of a CFM model trained with optimal transport coupling predicting the density for a randomly sampled set of donuts is shown in Figure 8(b). The model was conditioned using 256 samples sampled from the true distribution and asked to predict the density of each point in a  $512 \times 512$  grid. Model and training hyperparameters are shown in Table 4.

## E Code

We include all of our training and evaluation code as a ZIP archive. It will also be publicly available on GitHub upon publication.

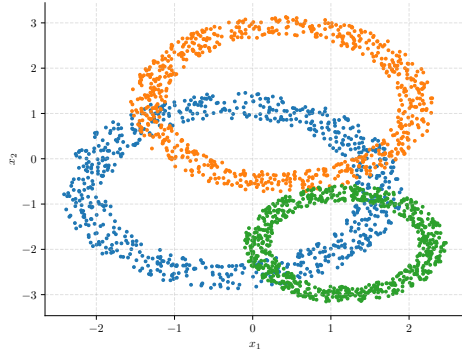

(a) Sample donut distributions. Each distribution has three parameters: mean, radius, and width.

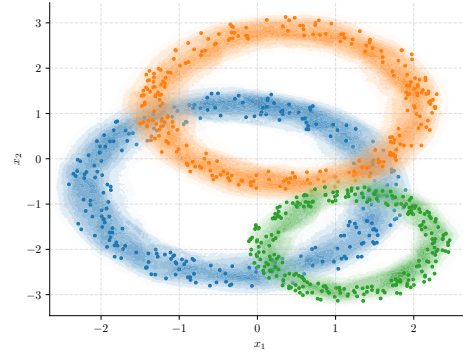

(b) Learned densities after conditioning the model on 256 samples from the target distribution.

Figure 8: Embedding the set of donut distributions in  $\mathbb{R}^2$  using Conditional Flow Matching
